# Supplementary material for: Preparation of TiO2/porous glass-H with the coupling of photocatalysis oxidation–adsorption system in the initial position and its desulfurization performance on model fuel
Source: Royal Society of Chemistry journal article supplement (doi:10.1039/d1ra04466d), 2021-01-01
Supplement: d1ra04466d1.pdf [file d1ra04466d1.pdf]

## Supporting Information

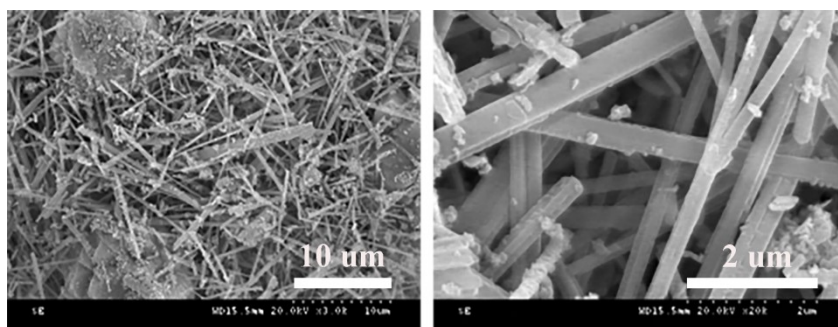

(a) X=5wt%

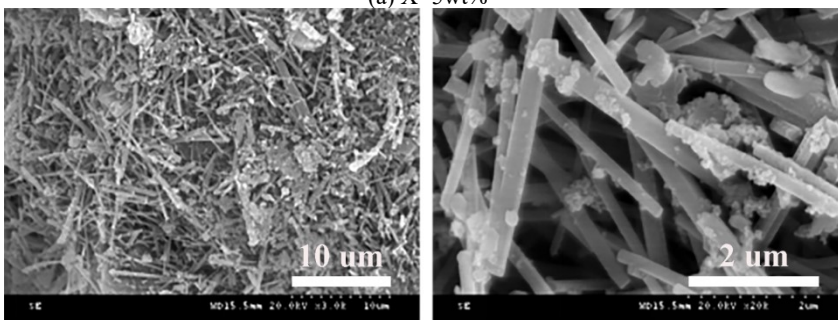

(b) X=10wt%

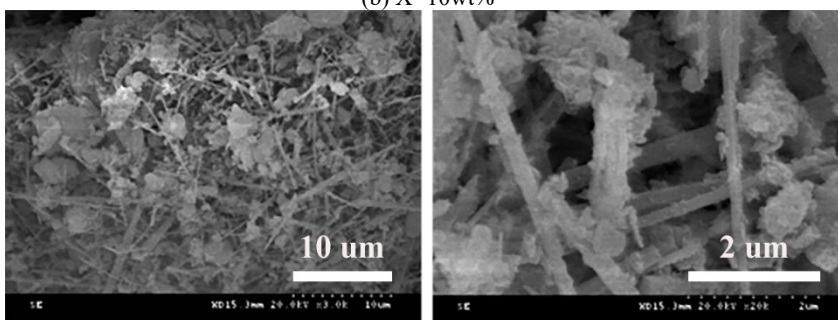

(c) X=15wt%

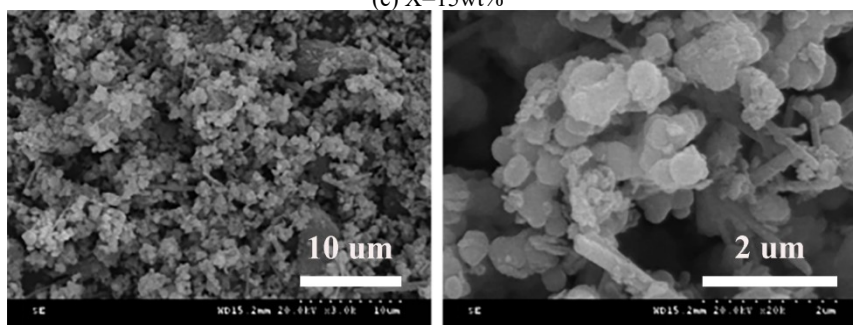

(d) X=25wt%

SEM micrographs of photocatalysis/adsorption catalysts with different loading of TiO<sub>2</sub>

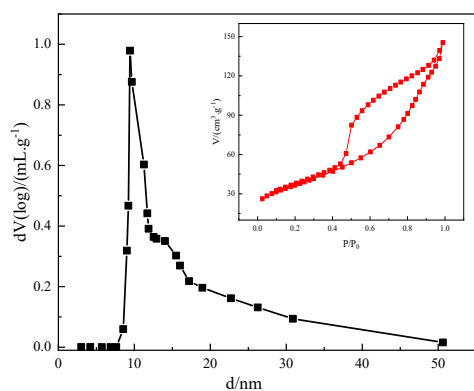

(a) porous glass-H

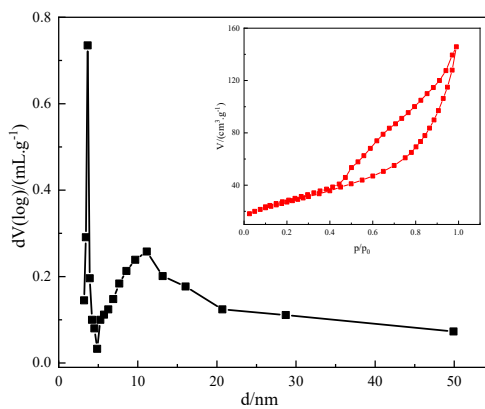

(b) TiO<sub>2</sub>

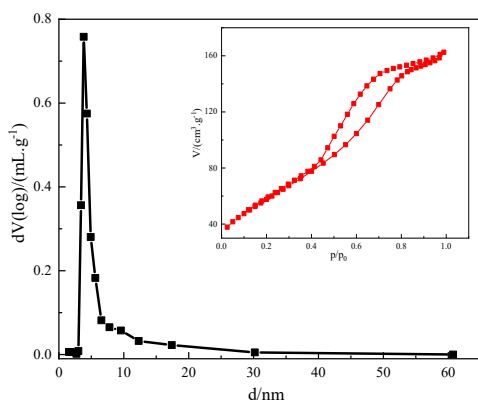

(c) TiO<sub>2</sub>/porous glass

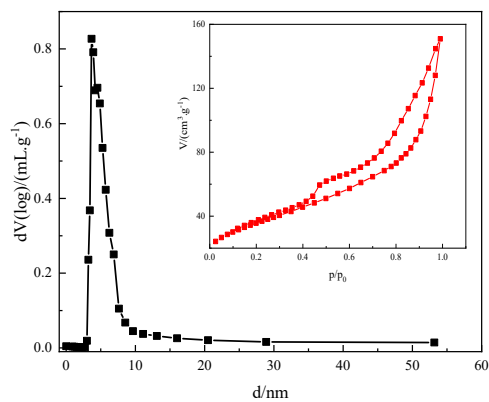

(d) TiO<sub>2</sub>/porous glass-H

N<sub>2</sub> adsorption-desorption curves and pore size distribution diagrams of different catalysts
